# Supplementary material
Source: PubMed Central journal article supplement (PMC5718098)

# Supplemental Fig. 1

**A** miR-122-5p real-time RT-PCR in human liver

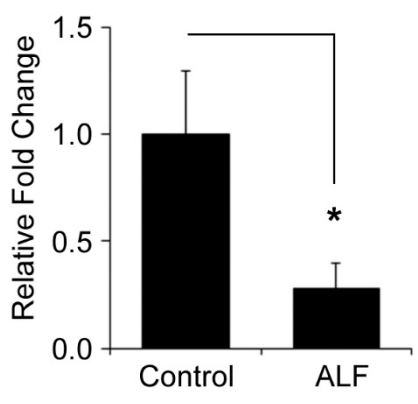

**B** Northern Quantification

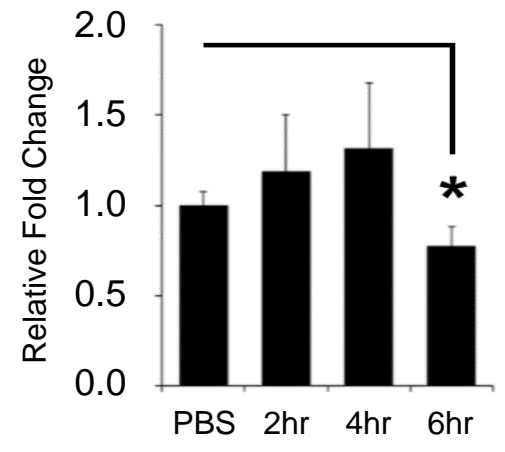

**C** **PBS** **APAP 2hr**

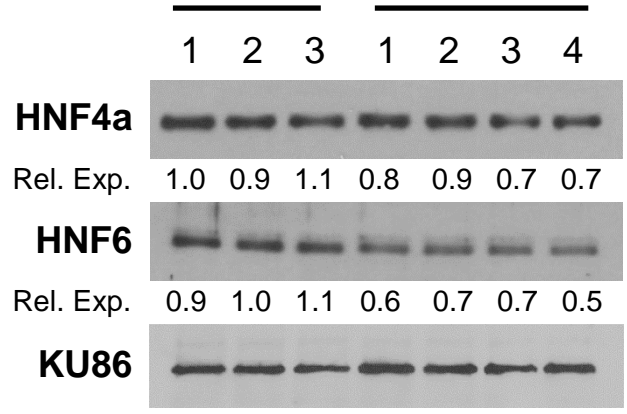

**D** ALT and serum miR-122 in Serum

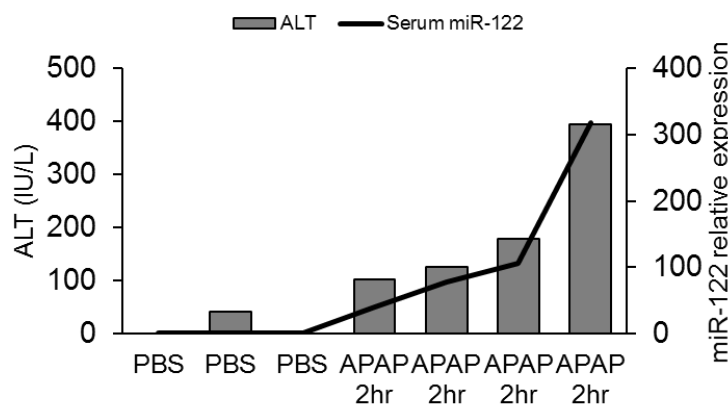

**E** **PBS** **APAP (150 mg/kg, 24hr)**

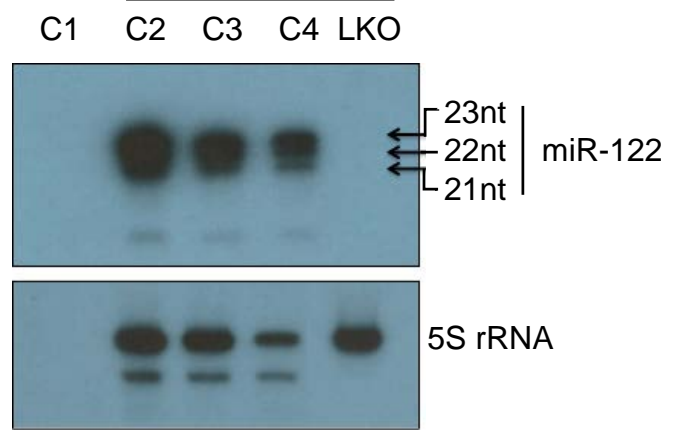

Supplement: mmc1.pdf [file mmc1.pdf]
