# Supplementary material
Source: PubMed Central journal article supplement (PMC5718098)

# Supplemental Fig. 6

## A *mir-122* real-time RT-PCR

■ NC-AS □ 122-AS

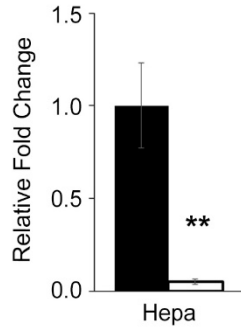

## *Ctcf* and *Ahr* real-time RT-PCR in Hepa

■ NC-AS □ 122-AS

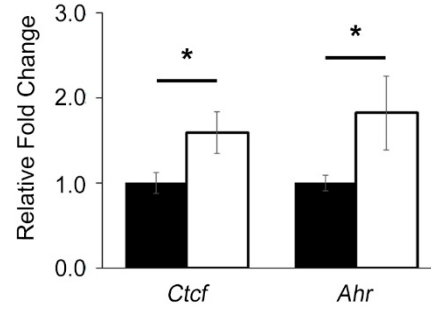

## B *mir-122* real-time RT-PCR

■ NC-S □ 122-S

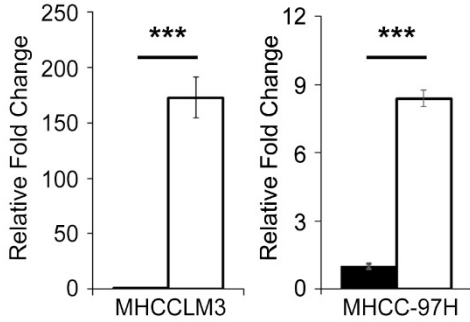

## C *Ctcf* real-time RT-PCR

■ NC-S □ 122-S

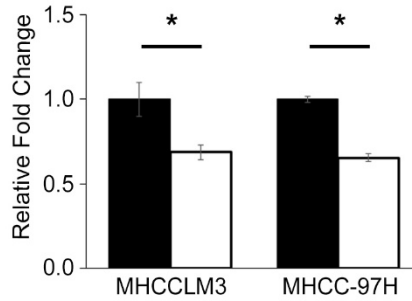

## D *Ahr* real-time RT-PCR

■ NC-S □ 122-S

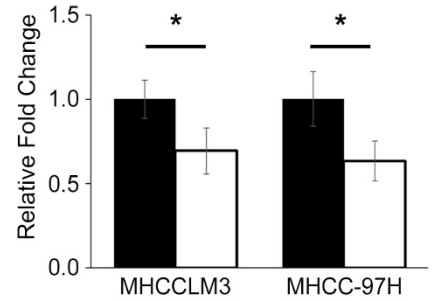

## E miR-122 seed match in *Ctcf* 3'UTR in humans and mouse

Position 314-320 of *Ctcf* 3'UTR 5' ... CUCCAUGUGGUA AACCACUCCAG .  
 ||||| |||||  
 hsa-miR-122-5p 3' GUUUGUGGUAACAGU----GUGAGGU

Position 313-319 of *CTCF* 3'UTR 5' ... CUCUUGAUCGUA AACCACUCCAG ...  
 |||||  
 mmu-miR-122-5p 3' GUUUGUGGUAACAGUGUGAGGU

## F Luciferase Assay

■ NC-S □ 122-S

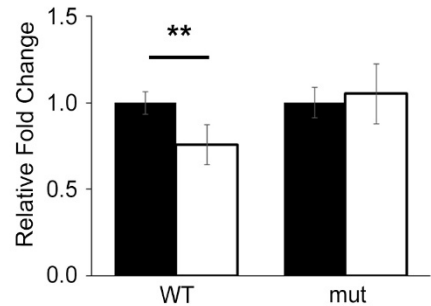

Supplement: mmc6.pdf [file mmc6.pdf]
