# Supplementary material
Source: PubMed Central journal article supplement (PMC5718098)

Supplemental Fig. 10

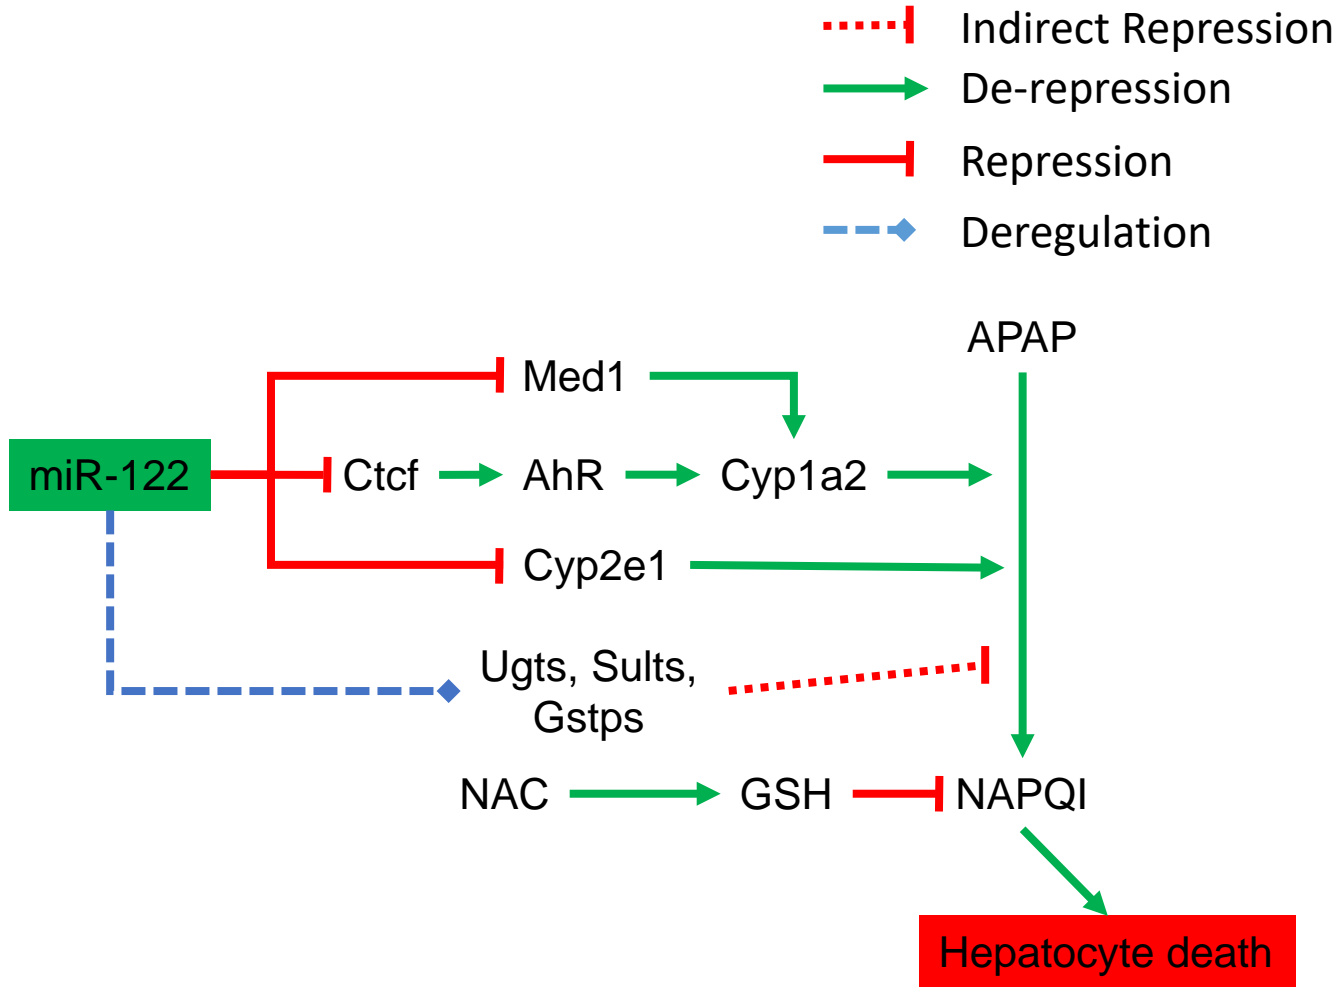

Supplement: mmc10.pdf [file mmc10.pdf]

# Supplemental Fig. 2

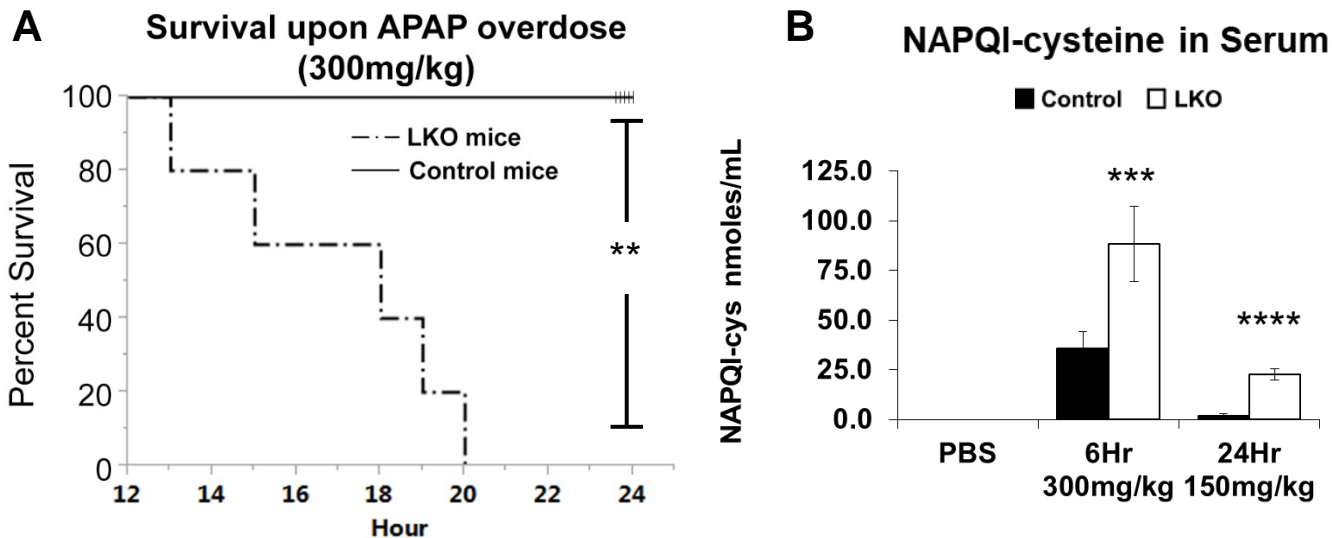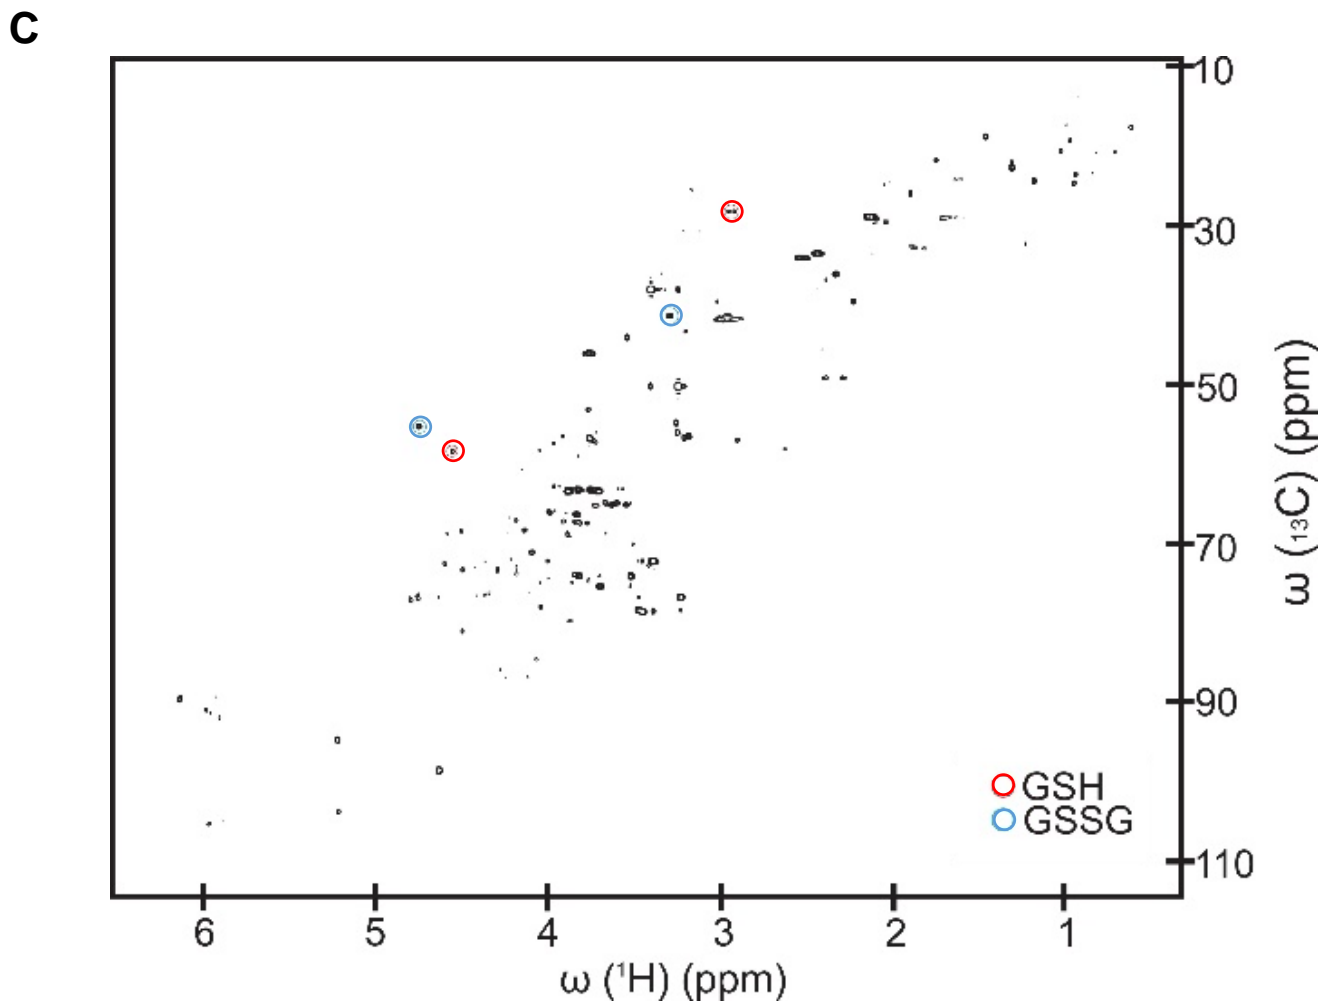

Supplement: mmc2.pdf [file mmc2.pdf]

# Supplemental Fig. 3

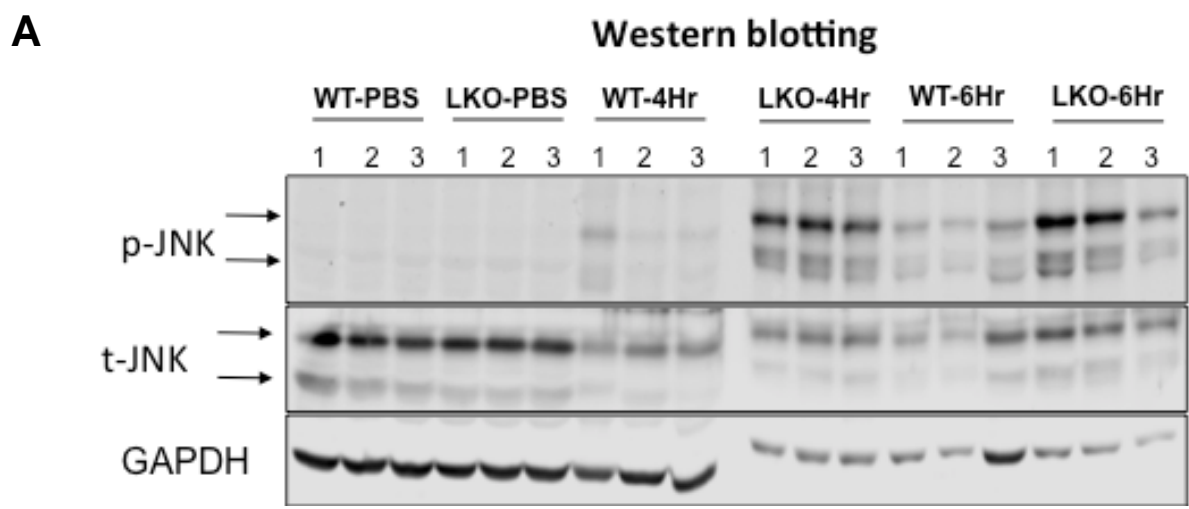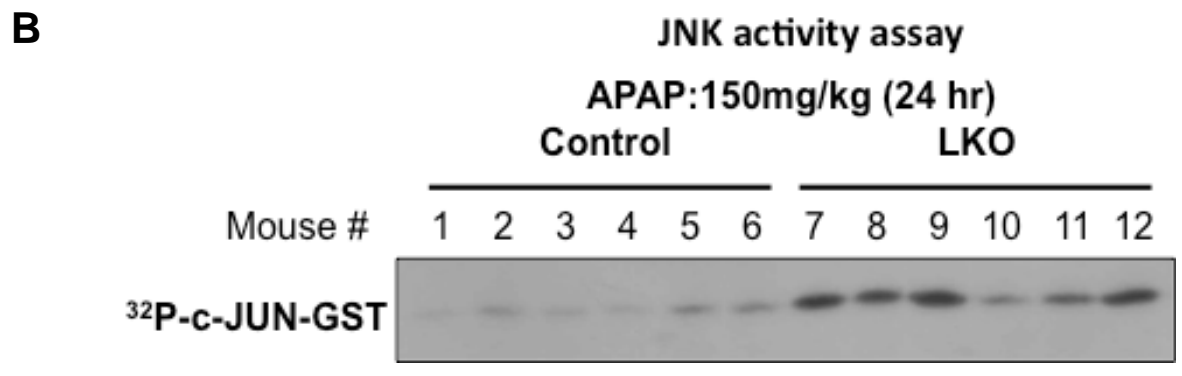

Supplement: mmc3.pdf [file mmc3.pdf]

# Supplemental Fig. 4

## A TUNEL assay

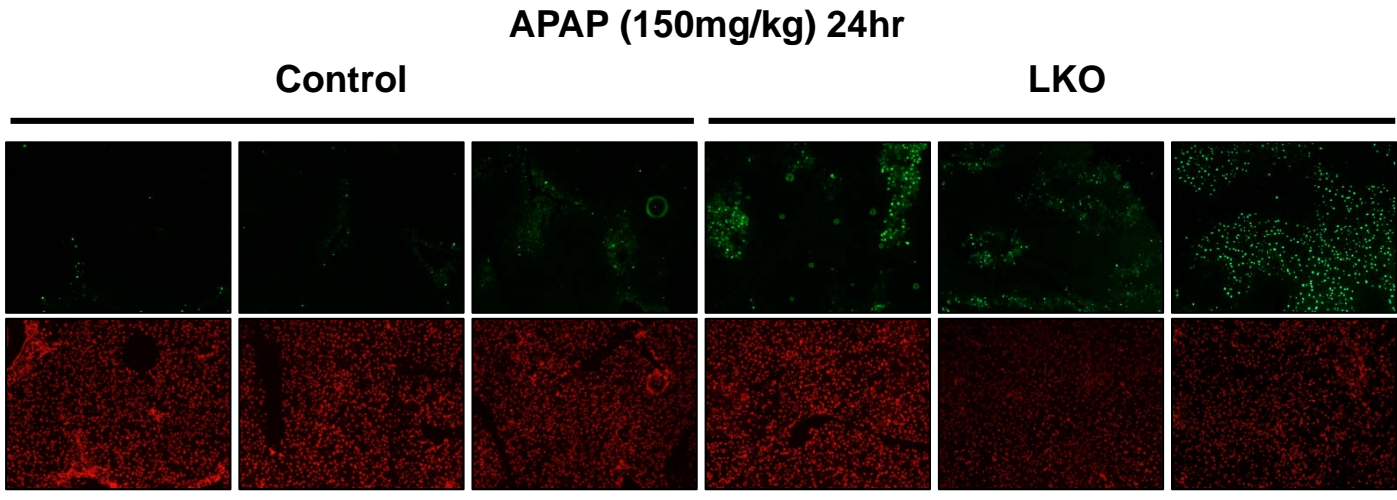

## B ki67 IHC

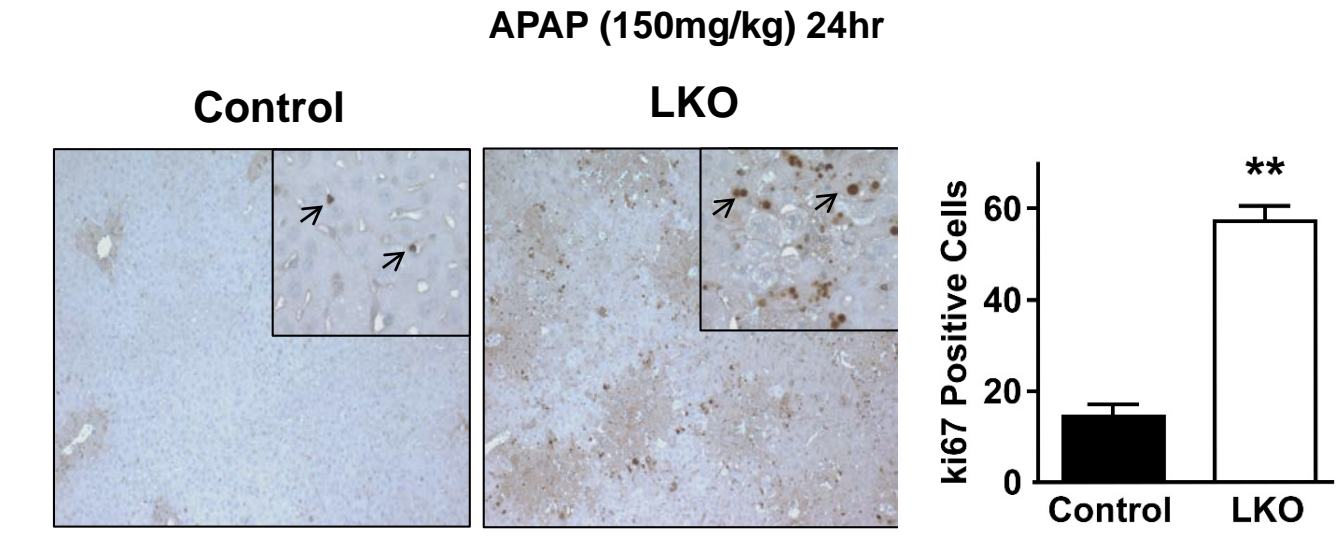

Supplement: mmc4.pdf [file mmc4.pdf]

# Supplemental Fig. 5

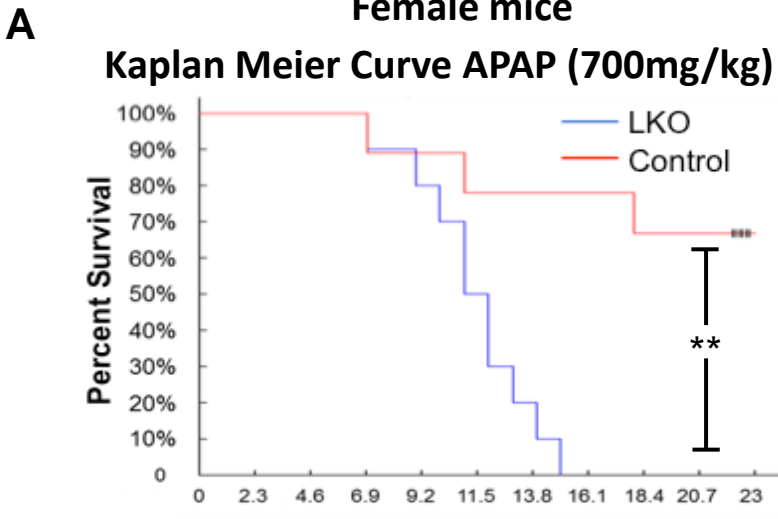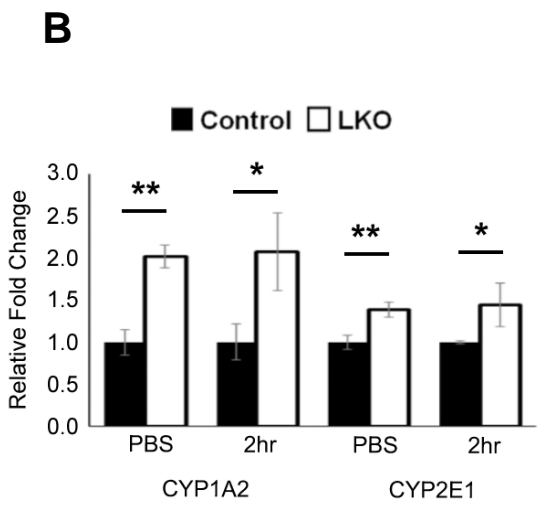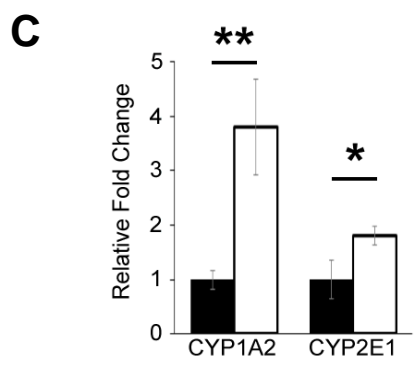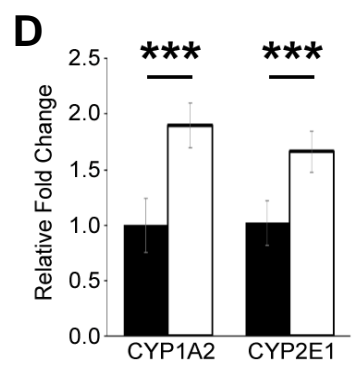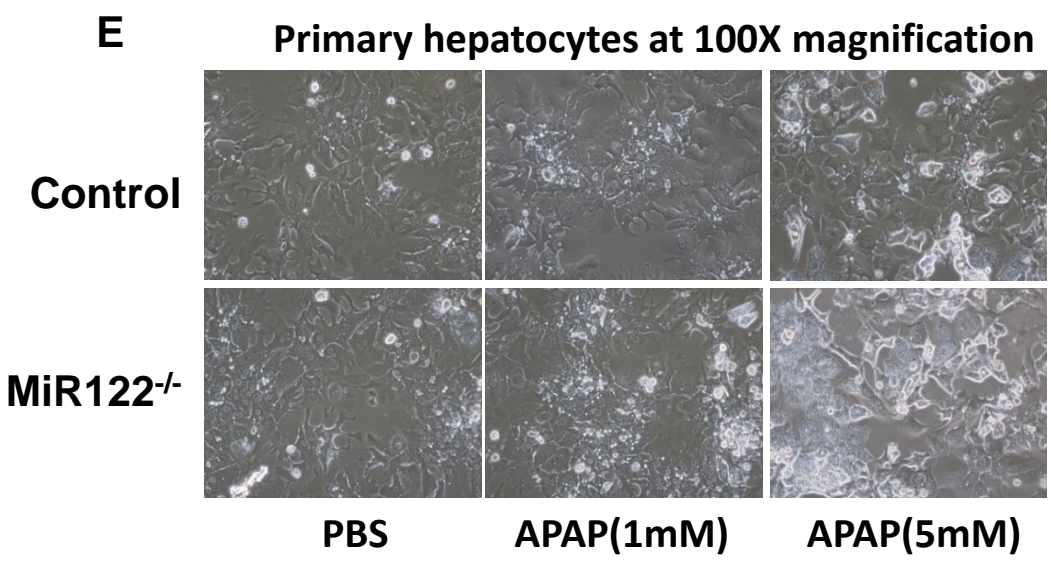

Supplement: mmc5.pdf [file mmc5.pdf]

# Supplemental Fig. 7

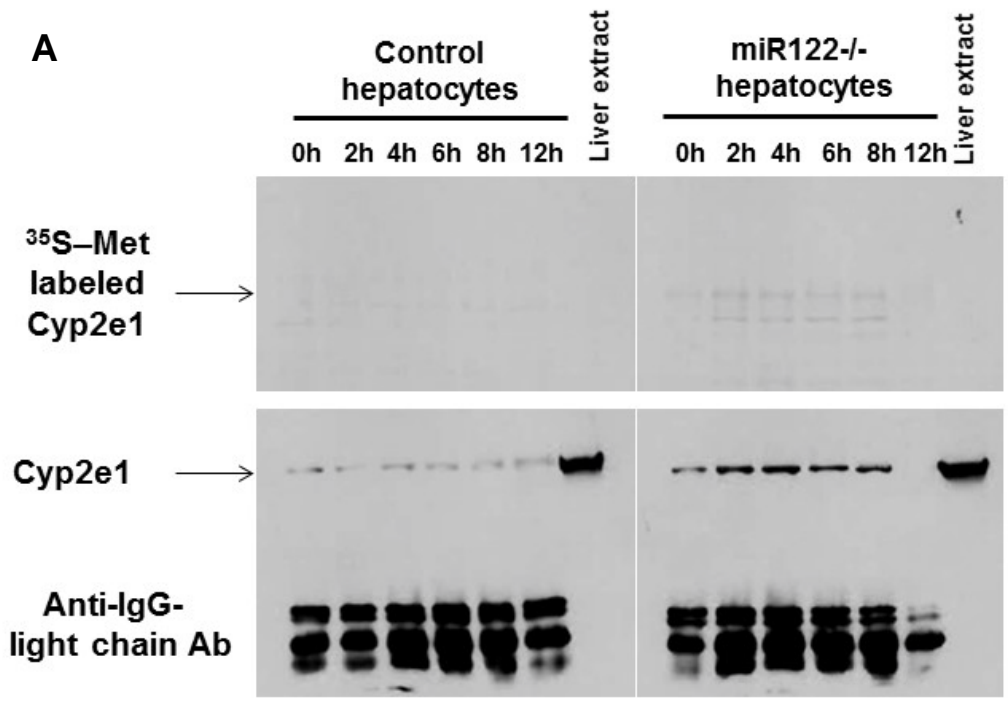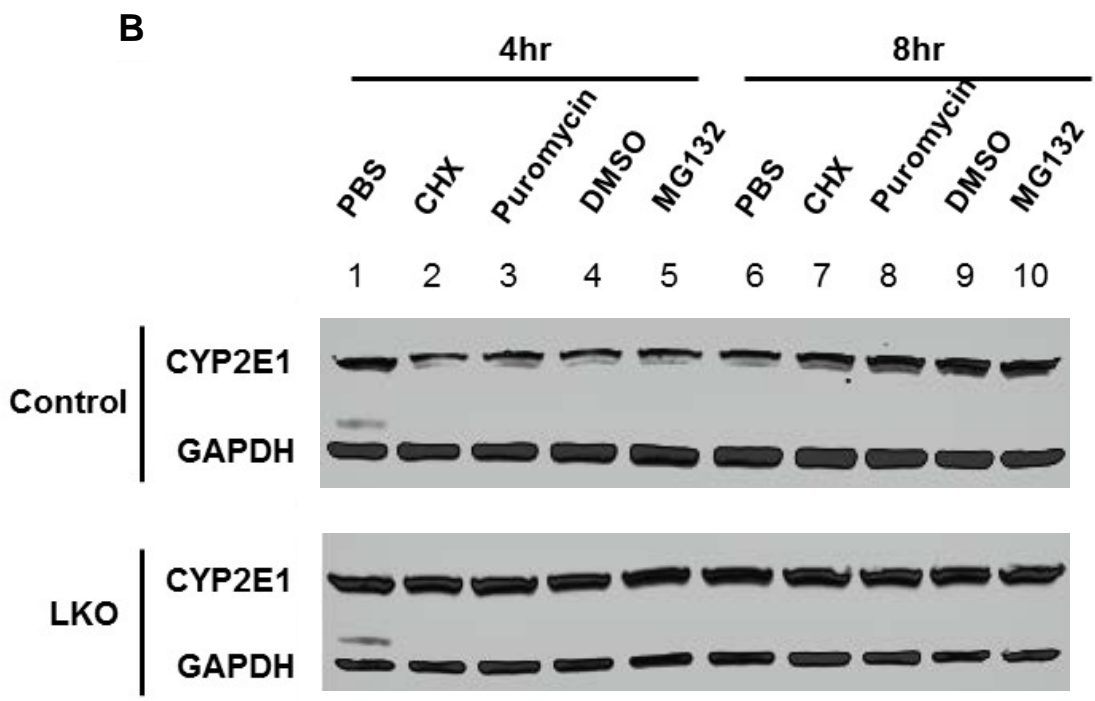

Supplement: mmc7.pdf [file mmc7.pdf]

# Supplemental Fig. 8

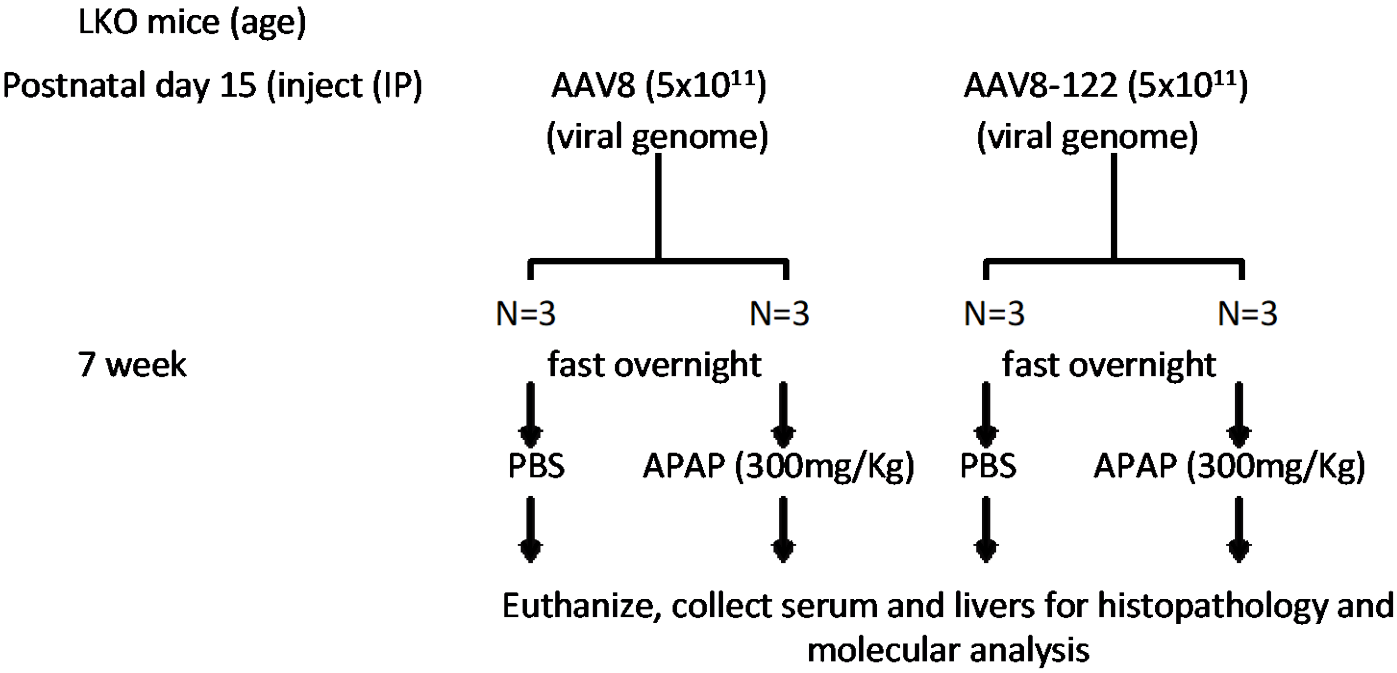

Supplement: mmc8.pdf [file mmc8.pdf]

# Supplemental Fig. 9

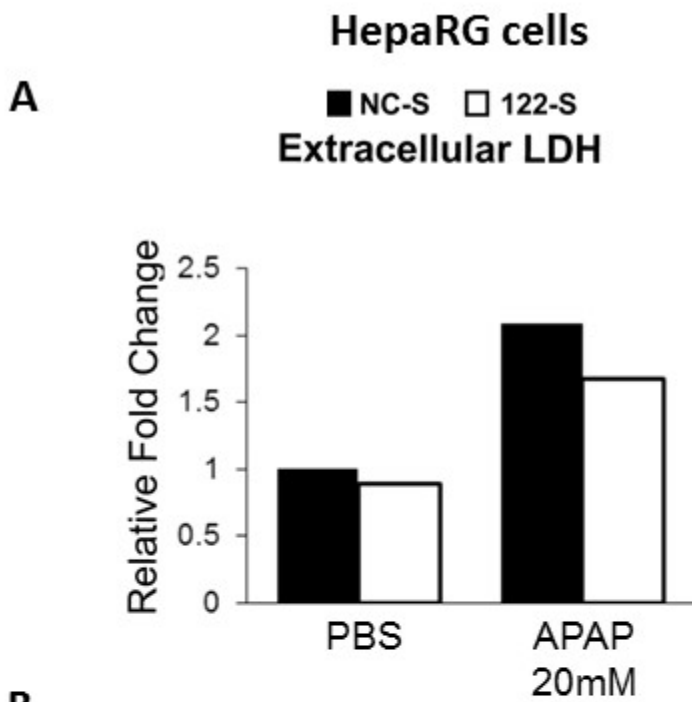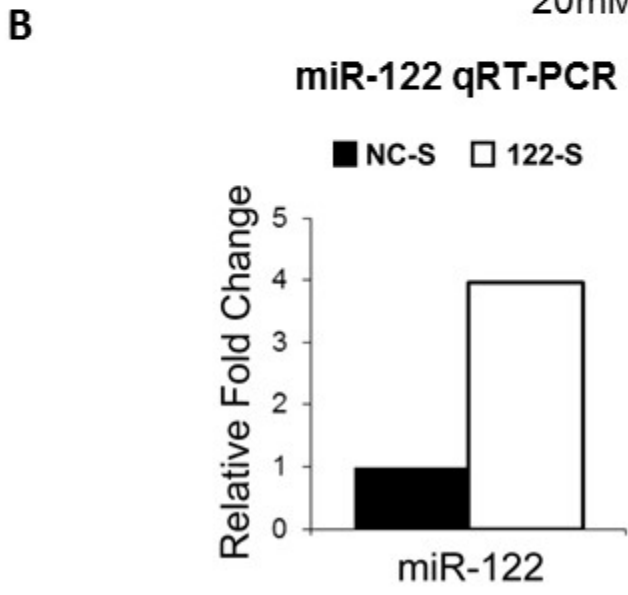

Supplement: mmc9.pdf [file mmc9.pdf]
